# Supplementary material
Source: publisher figshare collection journal article supplement (https://tandf.figshare.com/ndownloader/files/14992697)
Supplement: Supplementary file 1 [file 14992697]

**Supplemental Material**

**Table S****1:** Microsattellite loci used: the number of alleles (k), number of individuals typed (N), size range, heterozygosity observed (HO) and expected (HE), polymorphic information content (PIC), non-exclusion probability when one parent known (NE-P2), and non-exclusion probability when neither parent known (NE-PP) are shown for each locus.

Table S2: *Malurus* life history table reproduced with permission from Leitão *et al.* (2018), references for each species encloesd within) and details of White-shouldered Fairywrens added from the current study (bold).

Table S3: Dispersal distance by site and sex. Type of dispersal refers to if the dispersal event occurred between the year the individual fledged (‘natal’) and the next, or between years once the individual has reached reproductive maturity (‘adult’).

Table S4: Extra-pair paternity (EPP) of *moretoni* offspring (already-fledged young in social groups) captured in Milne Bay 2011-2014.

Table S5: Estimate, standard error, and t-value for a linear mixed model for the effect of subspecies (*lorentzi* or *moretoni, lorentzi* here as the reference level) and age on scaled cloacal protuberance volume and tail length. For both measures, all recaptured birds within years were averaged and individual ID was used as a random effect. Age categories are relative, in that 1 is equivalent to ‘one year or older’ and so on, in that age 2 and higher reflect repeated captures one calendar year later.

Table S6: Results of t-tests for comparisons in Table 2 with raw and Benjamini–Hochberg corrected p-values.


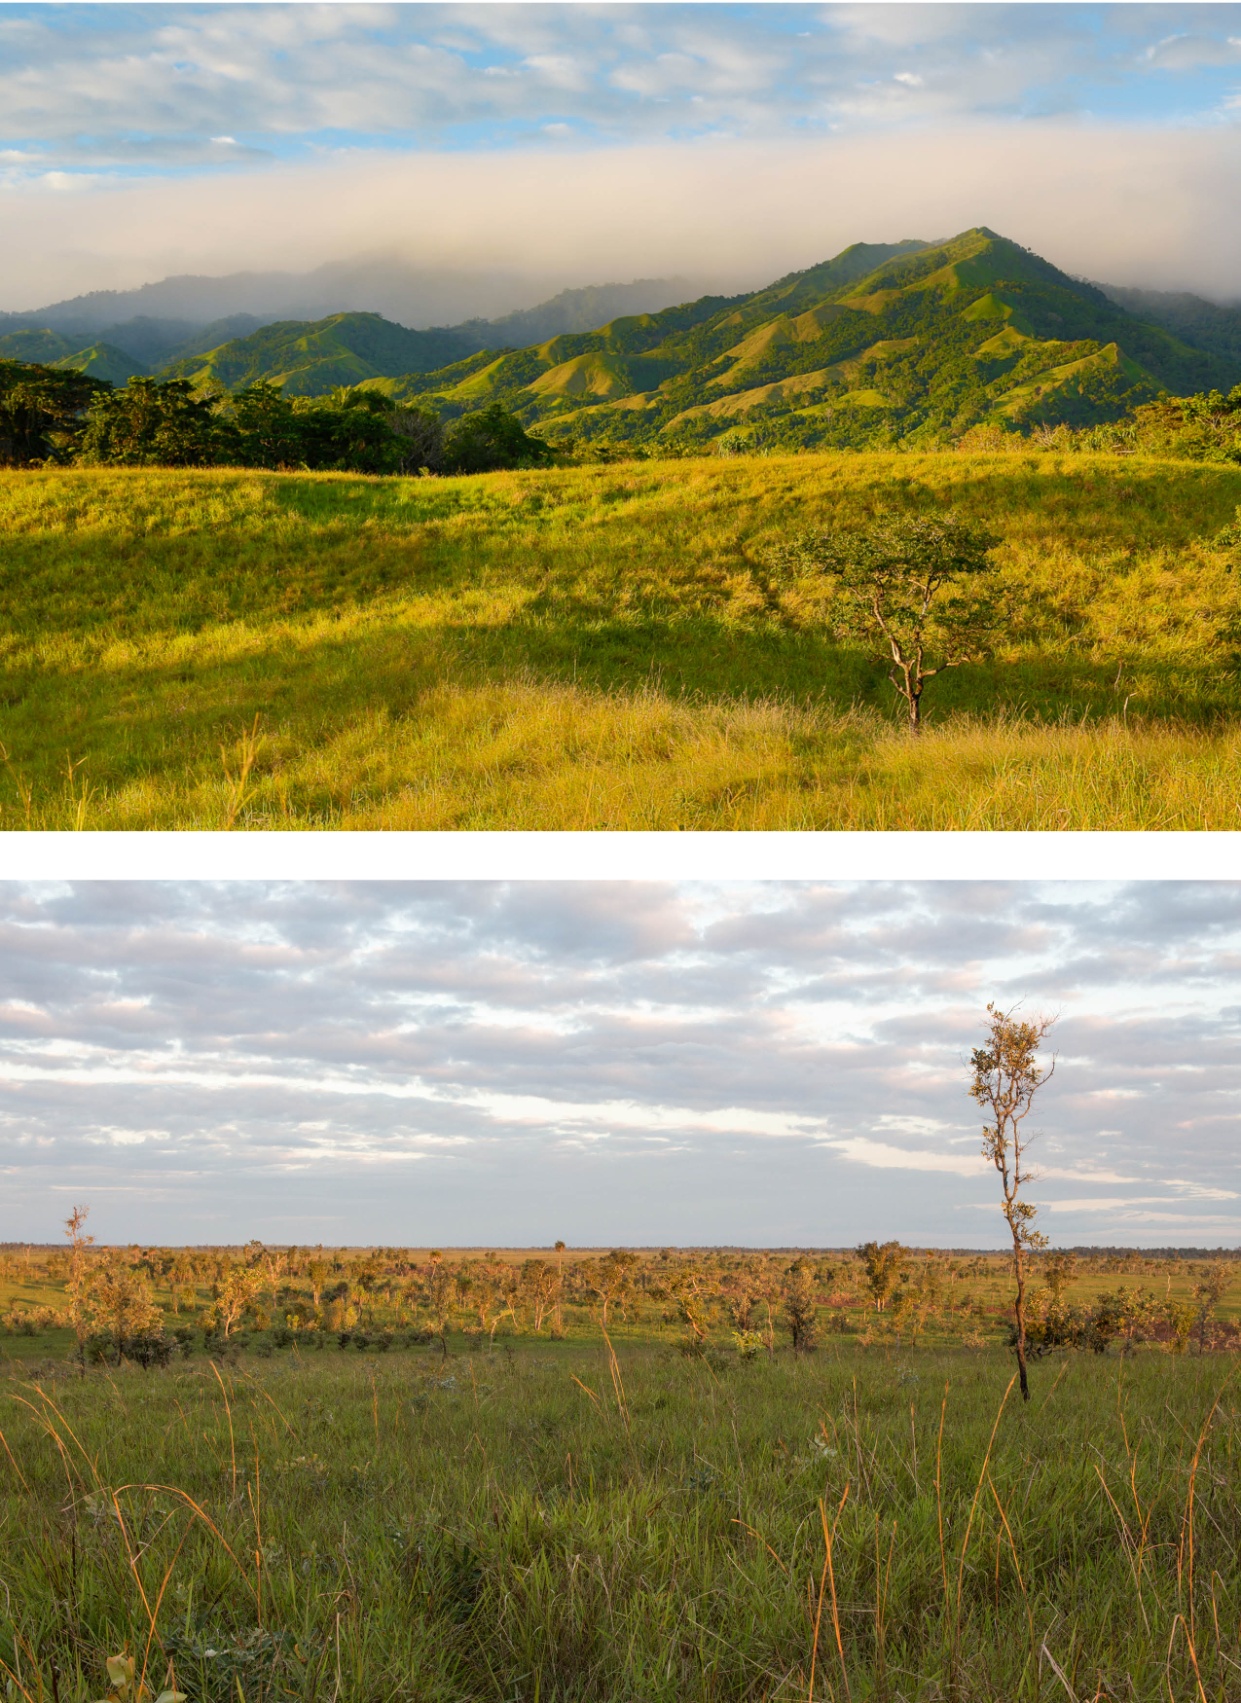


Figure S1: Photograph of the environments at two study sites: Upper: Garuahi, Milne Bay Province, Papua New Guinea (credit: Maxime Aliaga). Lower: Obo, Western Province (EDE).

**
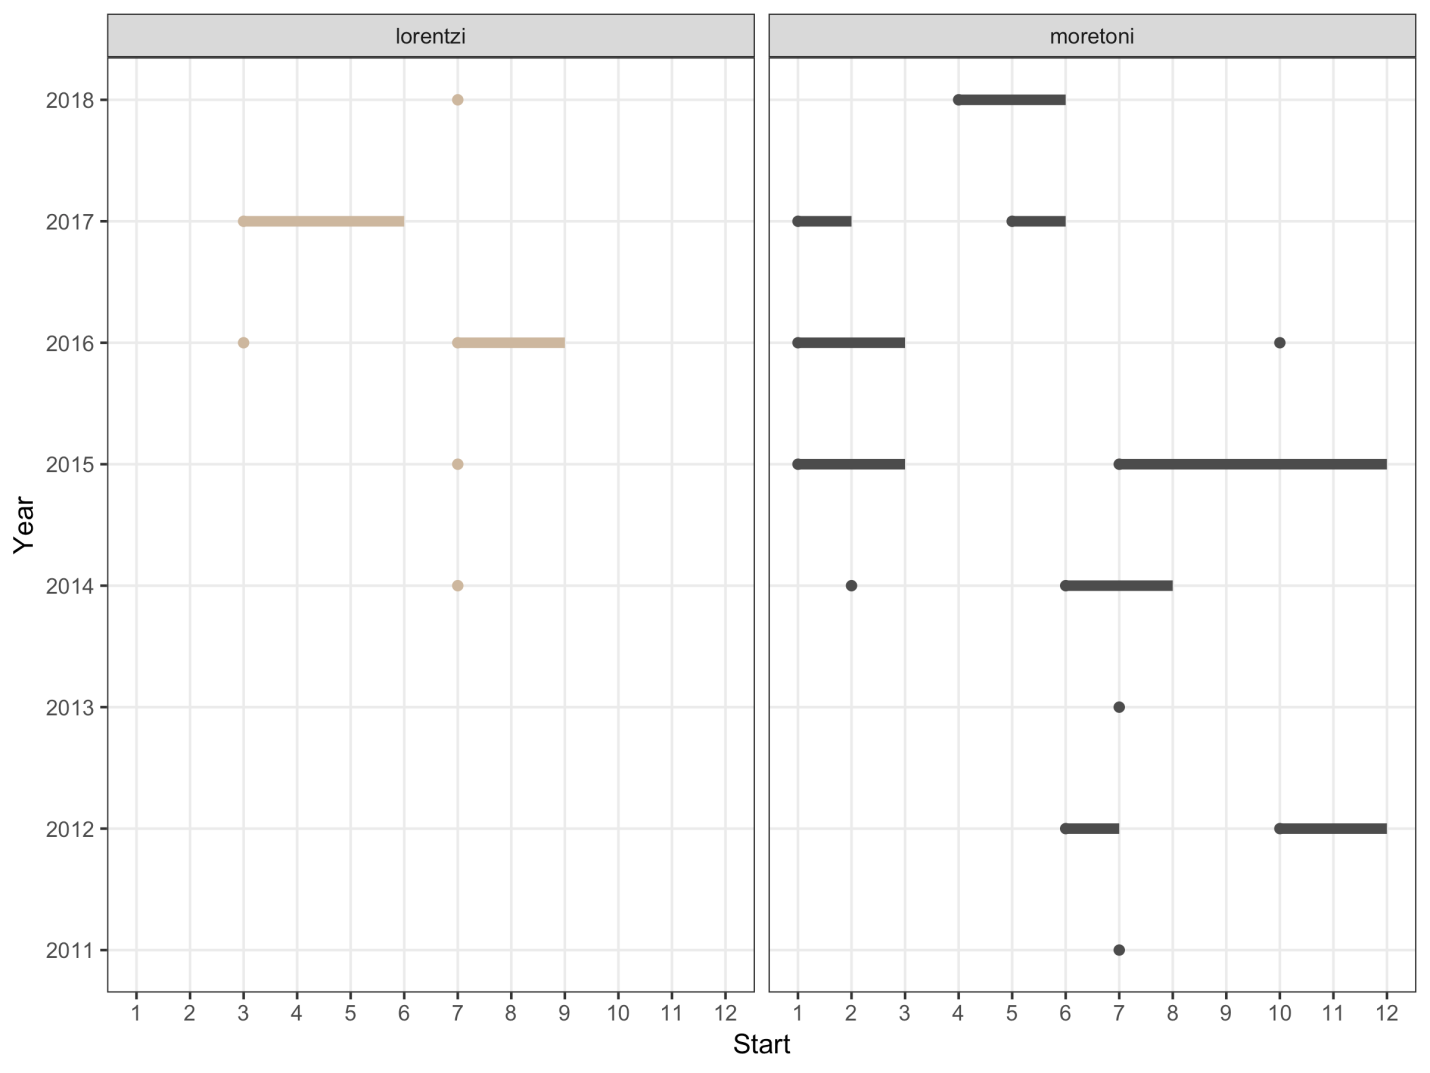
**

Figure S2: Timing of visits to our study sites in the White-shouldered Fairywren populations of *M. a. lorentzi* (left, red) and *M. a. moretoni* (right, green) between 2011 and 2018 (single points represent single month visits).


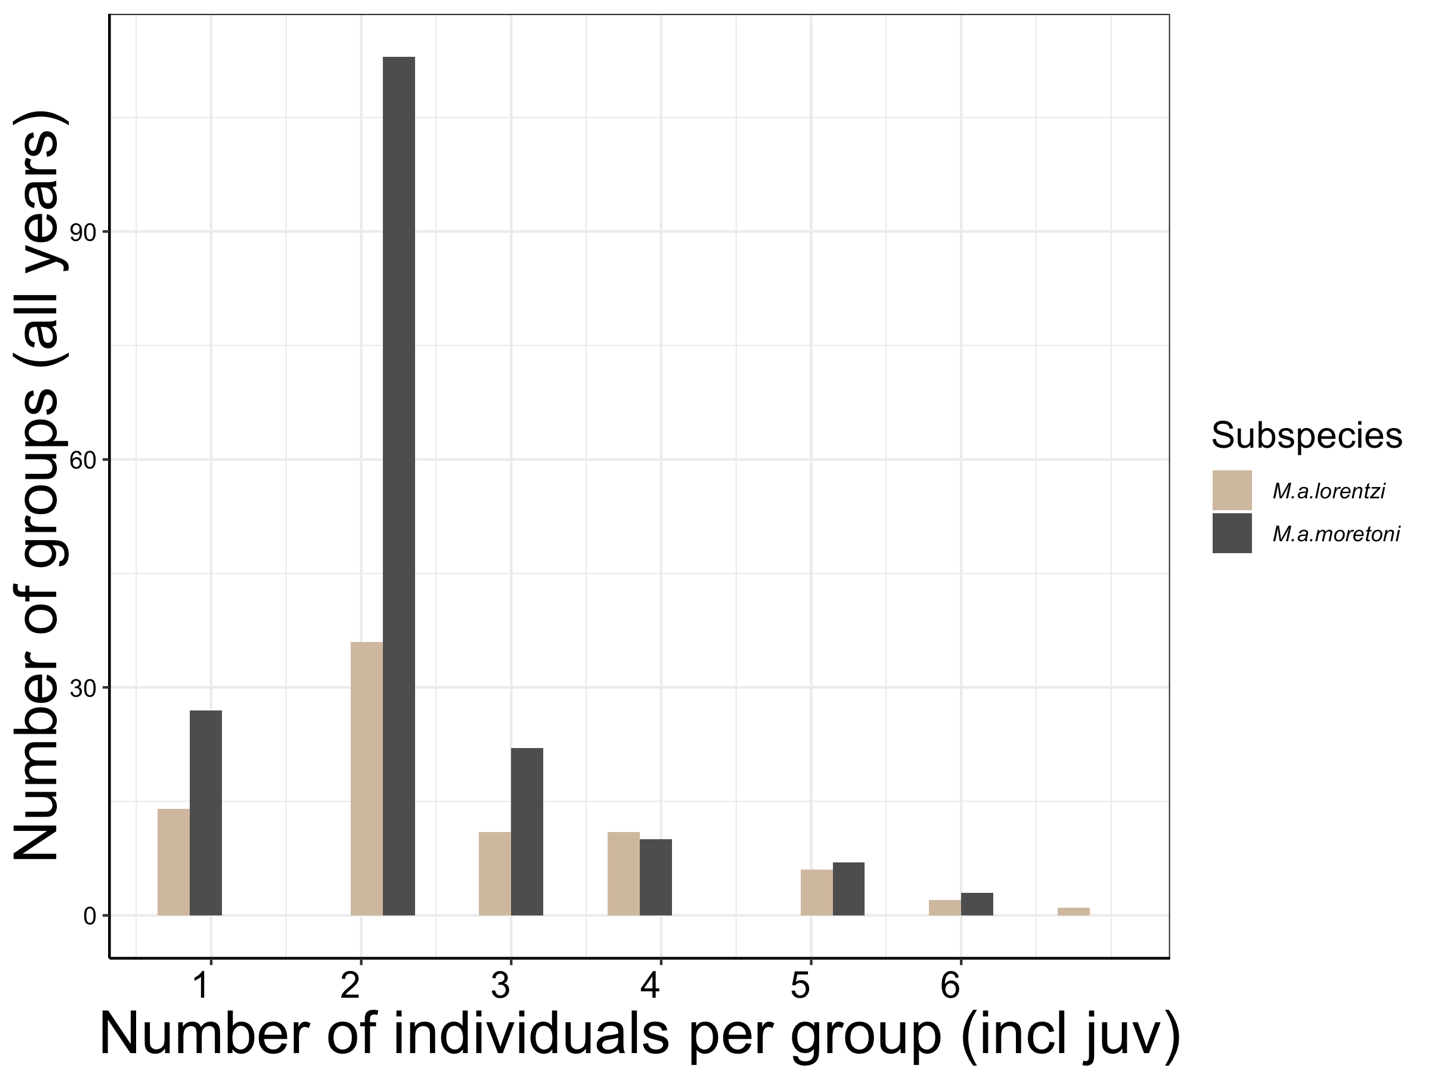


Figure S3: Histogram of group size distribution across years 2011-2017 by subspecies (brown = lorentzi, black = moretoni).


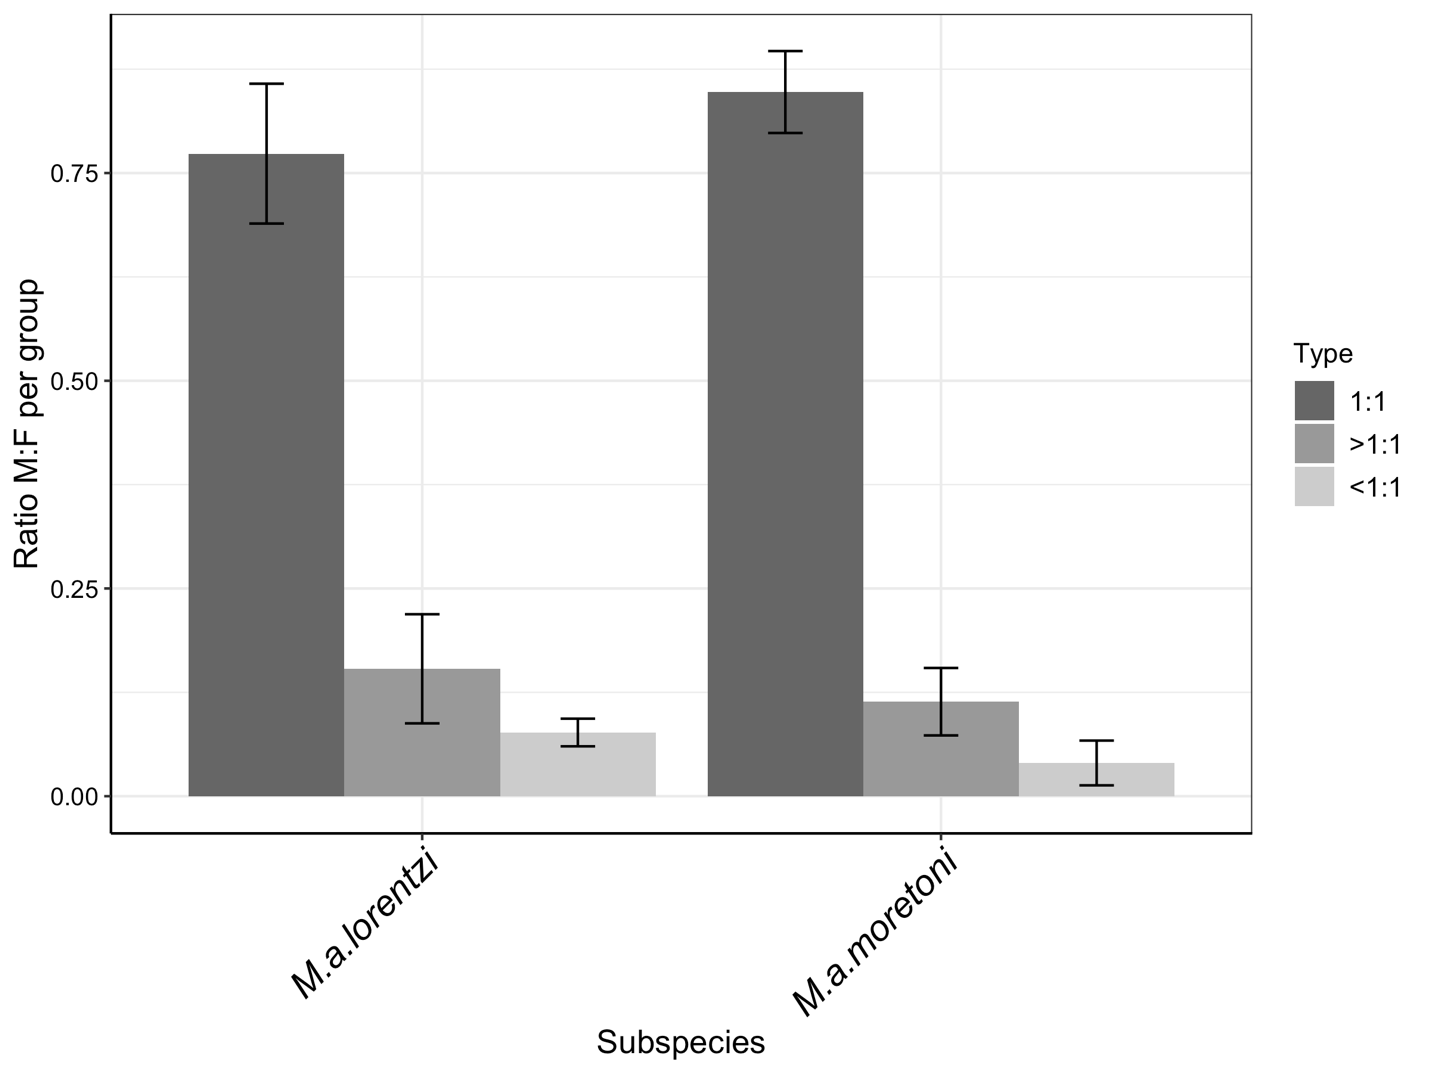


Figure S4: The ratio of males to females in each group (excluding first year individuals) averaged across all groups in both lorentzi and moretoni each year. Groups with more males than females are >1:1 and groups with more females than males are <1:1. Error bars denote standard error across years.


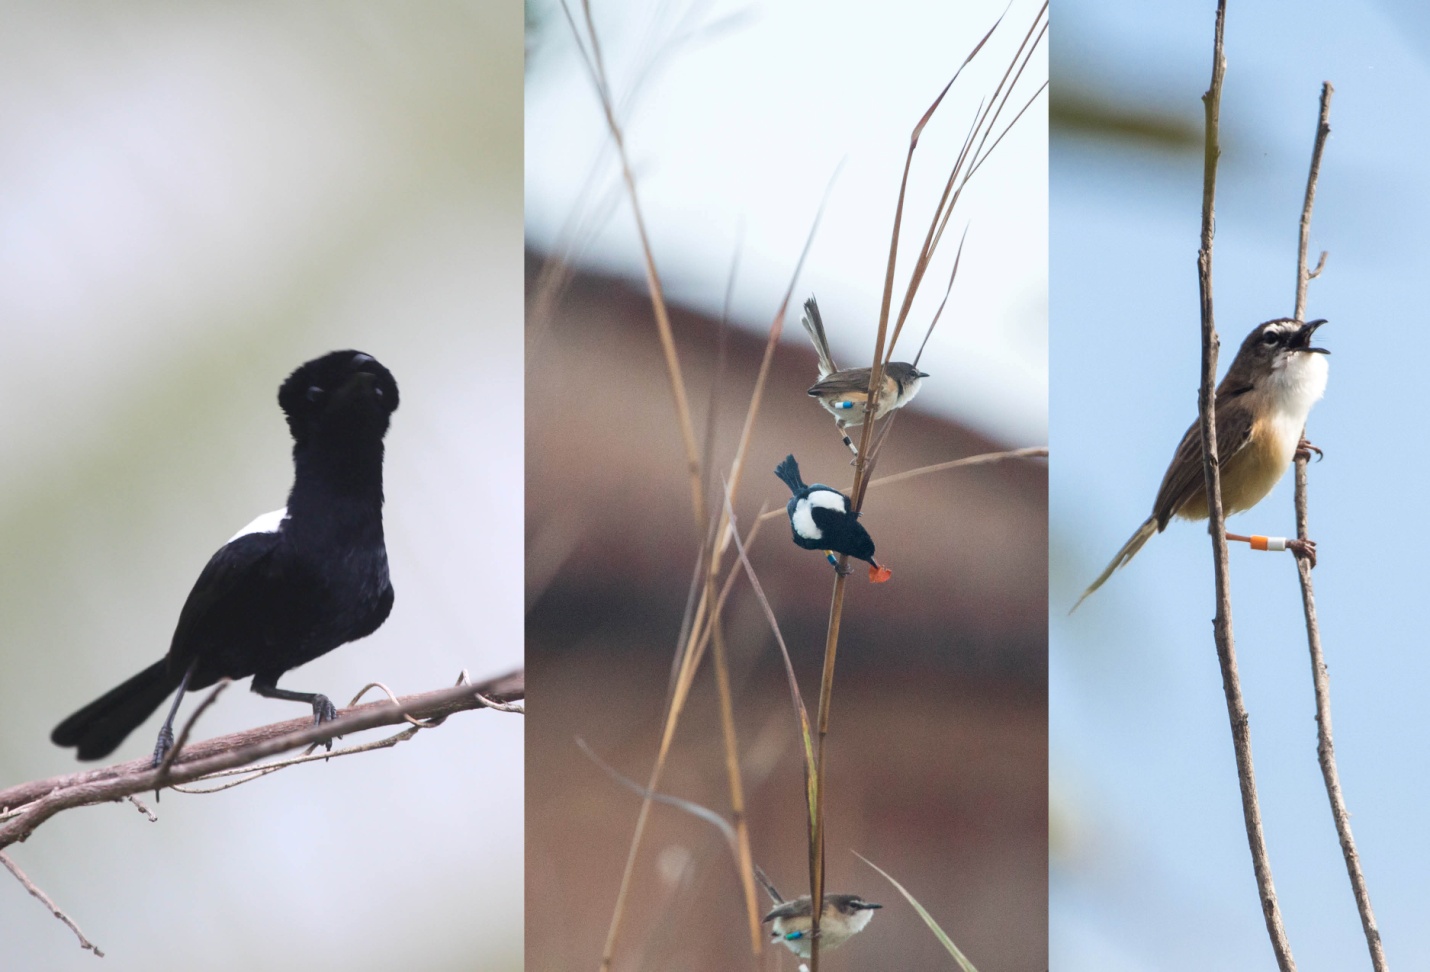


Figure S5: Photographs of key behaviors described in this study (credit: EDE). Left: male (moretoni) with crown and check feathers extended while singing in response to song playback. Middle: Male with red leaf and shoulder patch puffed in the presence of females while responding to a playback of female song. Right: female lorentzi extending white throat feathers while responding to the playback of a duet.

**
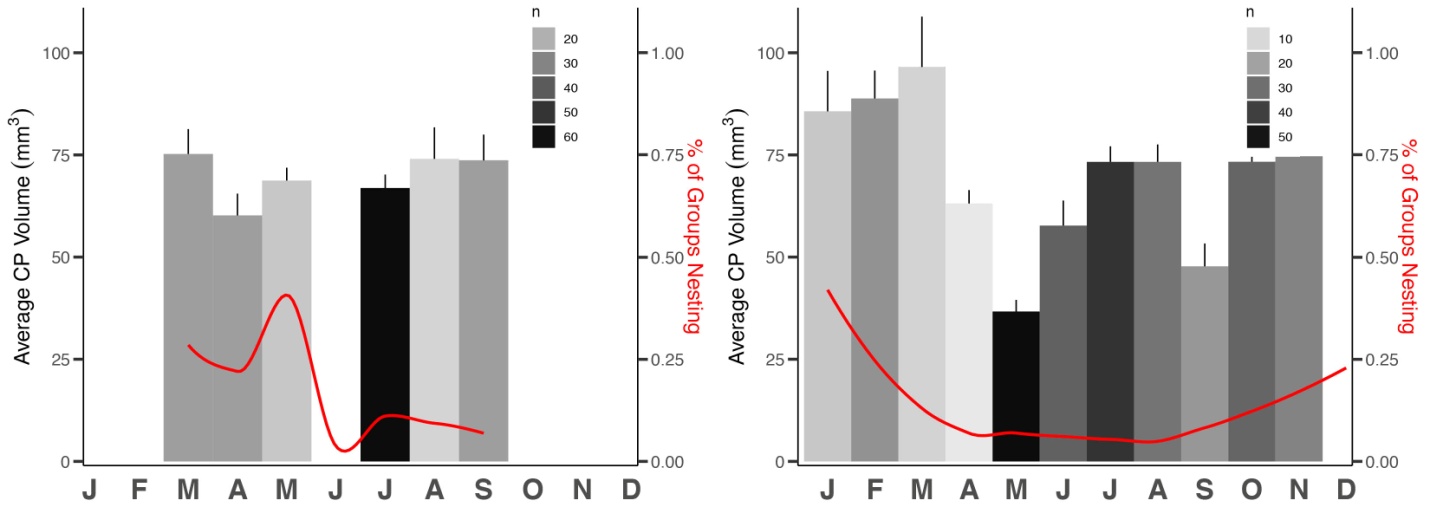
**

Figure S6: The relationship between average CP volume and the percent of groups nesting per month. The percent of groups nesting is estimated as the total number of nests found per month / the average number of groups per site.


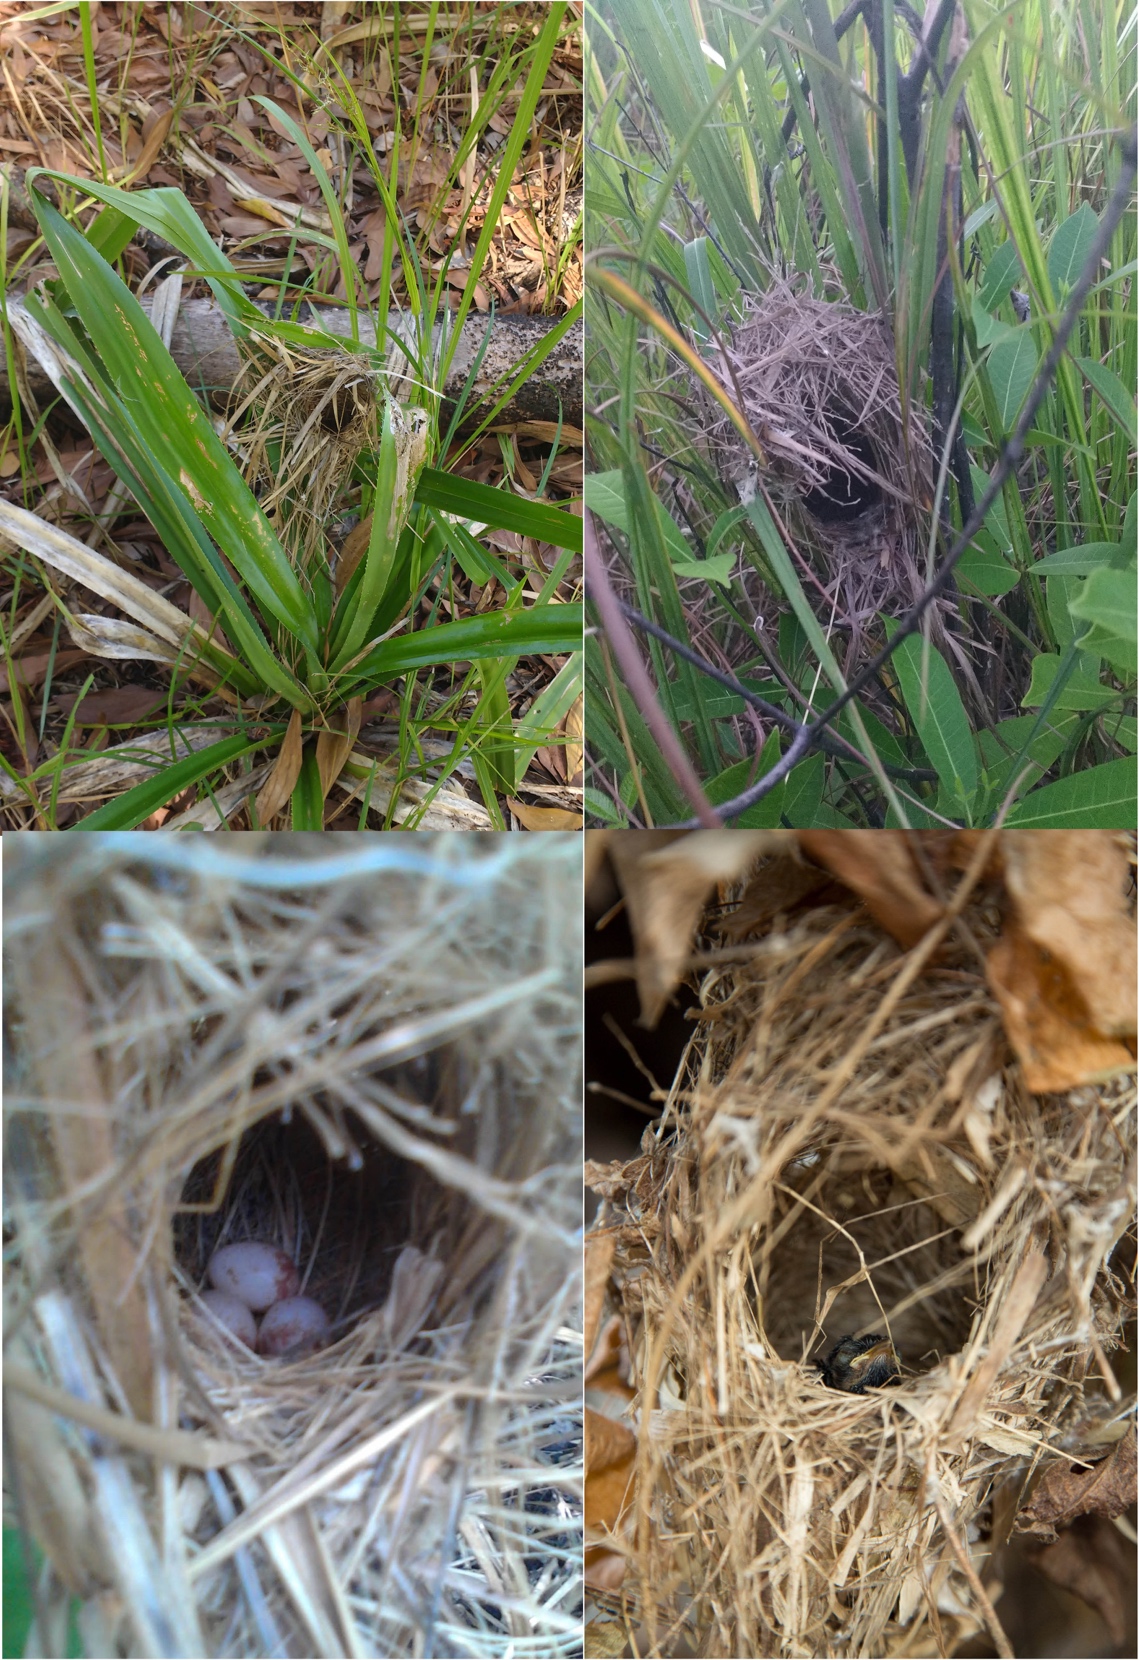


Figure S7: A nest of M. a. moretoni (*top left*) located on a small pandanus*,* and a nest of M. a. lorentzi in thick grass (*top right*),moretoni *nest with eggs (bottom left),* and a moretoni nest with nestling located beneath a banana tree (*bottom right*, credit Maxime Aliaga, others*,* credit EDE).

**
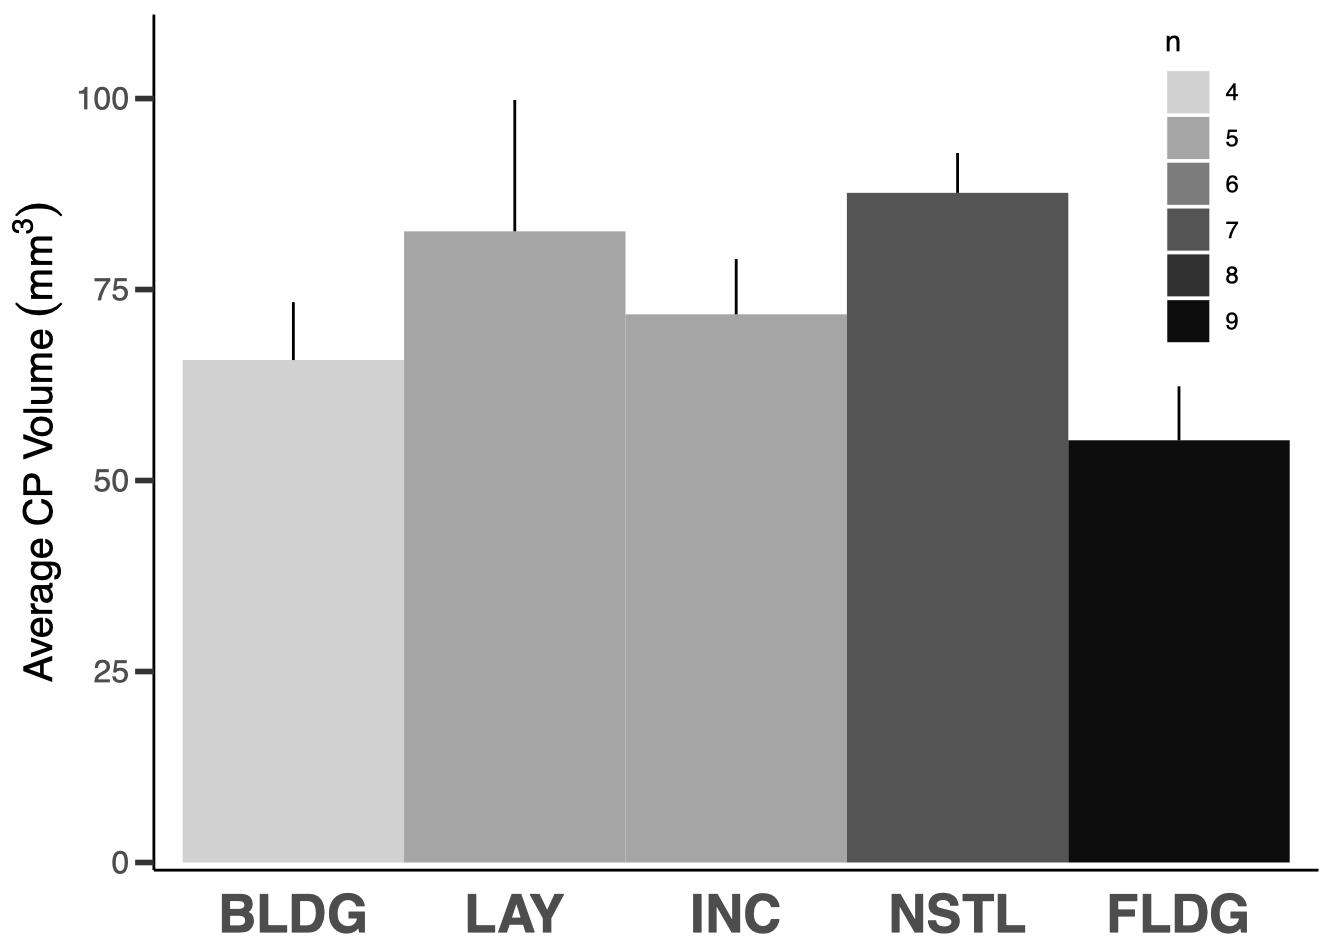
**

Figure S8**:** Variation in *moretoni* male CP volume according to nesting stage.


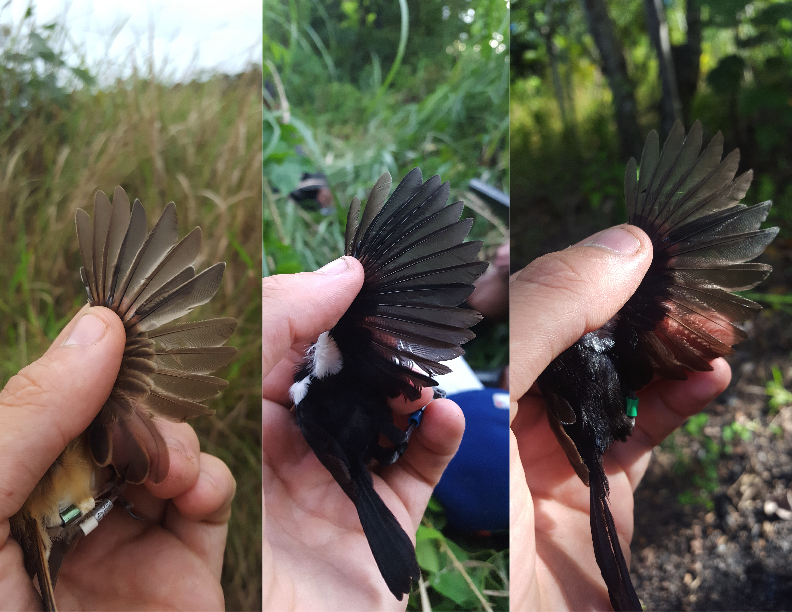


Figure S9: Photographs illustrating flight feather molt (credit: JAJ). **Left**: A female *lorentzi* (47671) molting non-sequentially; Age = 3, molting primaries 2, 5, 6, and 10, having replaced primaries 1,3,4, and primaries 7-9 are old. **Middle**: A male (47836) *moretoni* molting non-sequentially; molting primaries 1 and 8, having replaced 6-7, and primaries 2-5,9-10 are old. **Right**: A male (47847) molting in sequence; molting primary 3, having molted 1-2, and 4-10 are old.

Figure S10: Number of (left) and proportion of (right) individuals showing non-sequential molt by population and relative.

Figure S11: Photographs showing juvenile plumage and formative plumage in a first year moretoni White-shouldered Fairywren (Band #47787, credit: EDE). Top photo is at time of fledging and bottom two photos are at capture two months later. The bottom photo shows all juvenile flight feathers (grown in at the nest) that are not molting, while other body feathers are replaced. The juvenile plumages differs from formative plumage in lacking the white shoulder patch, but both are different from adults in having a white throat and chest.


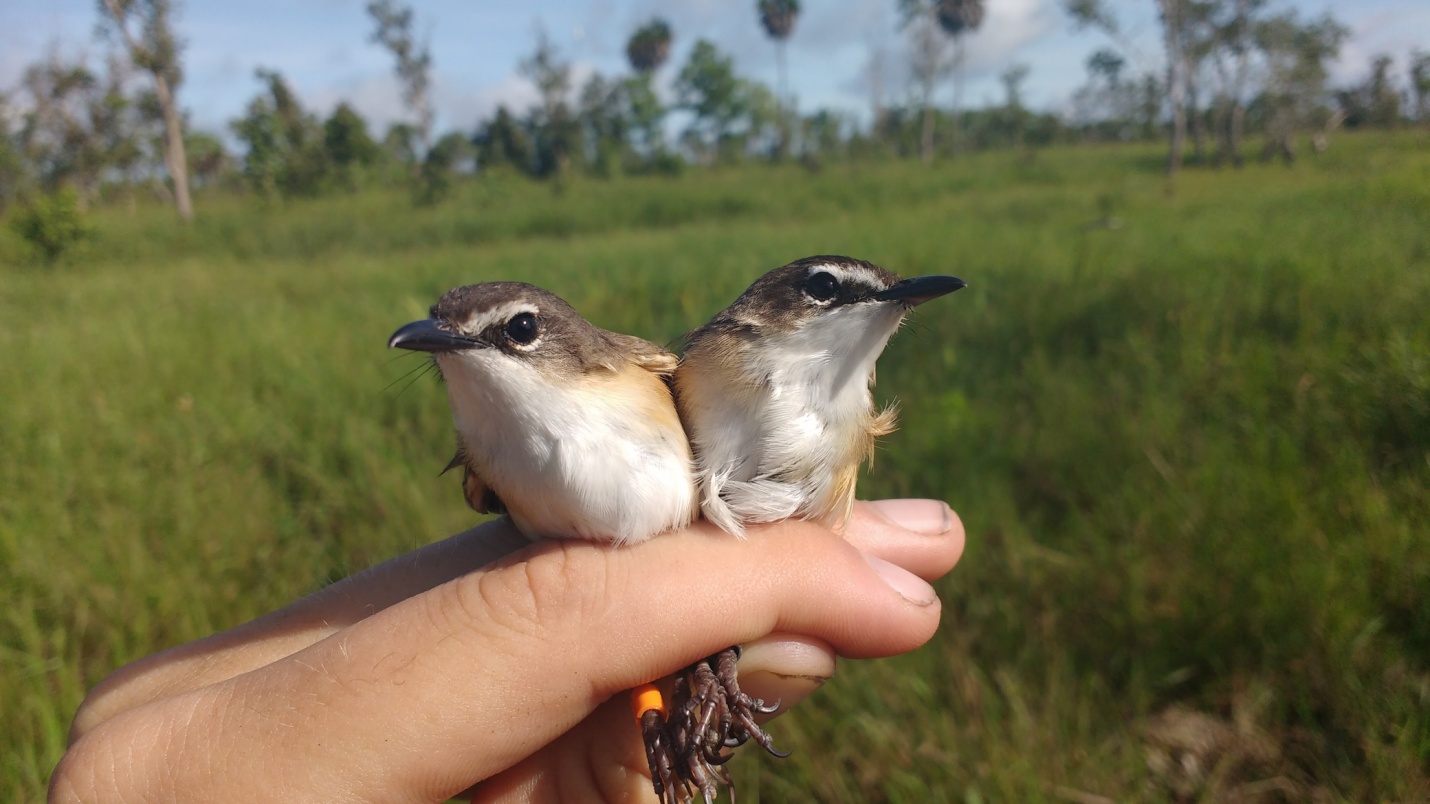


Figure S12: Adult female lorentzi (left) and adult male lorentzi exhibiting delayed plumage maturation (right). The pictured male maintained a territory with the pictured female and had a measurable cloacal protuberance with an enlarged tip, indicative of breeding ability (credit: EDE).

Figure S13: Some female *moretoni* have white on the chin and/or white above the eyebrow, however the likelihood of an individual having white on either patch does not seem to be associated with age (see Figure S14). We assigned a rank to the extent of white on the chin or eyebrow using a scale from 0-3, with 3 being the most extreme amount of white and 0 the least. In this figure, we grouped 0 as “black” and 1-3 as “white.” The y-axis denotes the number of individuals captured in each age category possessing the white patch. The top two plots include all captures, even if the first capture was not of known age, thus ages are relative. The bottom two plots only show individuals that were first captured as age=0 and therefore are of known exact age. First year individuals have white throats and some have white eyebrows.


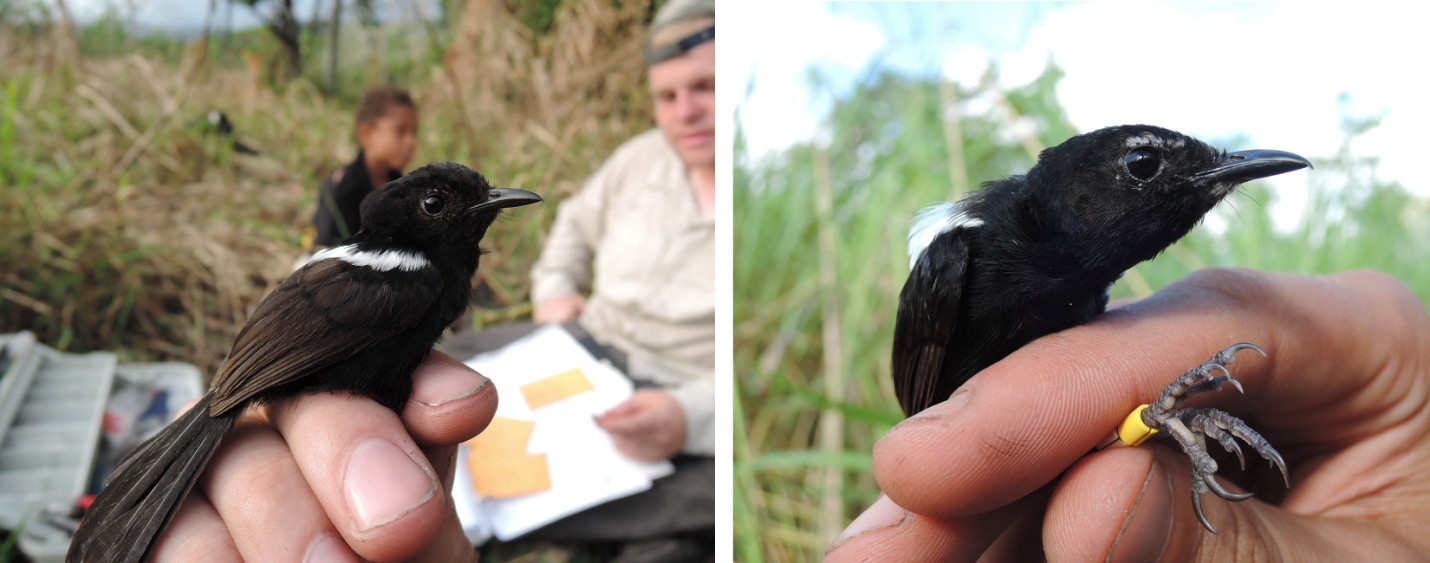


Figure S14: Photographs illustrating variation in white on the eyebrow and throat of moretoni females (credit: EDE). Left: female age 1+ with eyebrow and throat score 0. Right: female age 3+ with eyebrow score 2 and throat score 1.

Figure S15: The number of individuals molting primaries 1–3 by month and subspecies. For most individuals, flight feather molt initiates at primary 1 and so these data approximate the onset of flight feather molt in each subspecies.

1. A. V. Leitão, M. L. Hall, B. Venables, R. A. Mulder, Ecology and breeding biology of a tropical bird, the Lovely Fairy-Wren ( Malurus amabilis ). *Emu - Austral Ornithol.*, 1–13 (2018).
